# Supplementary material
Source: PubMed Central journal article supplement (PMC3373218)
Supplement: supp_djs035_jnci-JNCI-11-0253-s01.pdf [file supp_djs035_jnci-JNCI-11-0253-s01.pdf]

# **The Diesel Exhaust in Miners Study: A Cohort Mortality Study with Emphasis on Lung Cancer**

## **Supplementary Materials**

Space considerations prohibited full presentation of results from all analyses in the main article. Full details are provided here for proportional hazard modeling results on the following topics:

- 1) Ancillary information for the standardized mortality ratio analyses
- 2) Quartile analysis by worker location group
  - a. Unlagged, all tenures
  - b. 15-year lag, all tenures
- 3) Expanded categorical analysis by worker location group
  - a. Unlagged, all tenures
  - b. 15-year lag, all tenures
  - c. Unlagged, excluding workers with <5 years tenure
  - d. 15-year lag, excluding workers with <5 years tenure
- 4) Continuous models by worker location group
  - a. 15-year lag
- 5) Continuous models – ever underground workers
  - a. Effect of tenure restriction, exposure range, and lag period
  - b. Excluding <5 year tenure by age at starting work at the study facilities
  - c. Alternative exposure metrics
  - d. Results by state/ore type
- 6) Continuous models – surface only workers

- a. Effect of tenure restriction, exposure range, and lag period
  - b. Excluding <5 year tenure by age at starting work at the study facilities
- 7) Continuous models – ever underground and surface only workers
- a. Underlying and contributing lung cancer deaths
  - b. Underlying esophageal cancer deaths
- 8) Expanded categories and continuous models – ever underground workers
- a. Effect of using time since entry to study as underlying time variable.

All models except the last use age as the time variable, with respirable elemental carbon (REC) cumulative exposure and average intensity as time dependent variables, and birth year, sex, and race/ethnicity as fixed effects. In some subgroup analyses the coefficients for race/ethnicity and/or sex were unstable. In these cases, they were omitted from the model. The results were very similar, however, whether these variables were included or omitted.

Note that the numbering of the tables corresponds to the order in which they were mentioned in the main article.

### ***1. Further information pertaining to the standardized mortality ratio analyses***

Supplementary Table 1 provides details of the cause of death categories employed in the analysis, together with the International Classification of Diseases, 9<sup>th</sup> Revision codes.

Supplementary Table 2 provides results for causes of death that were not considered a priori but either were found to have statistically elevated or reduced standardized mortality ratios or had 10 or more deaths.

### ***2. Quartile analysis by worker location group***

The quartile information presented in Tables 4–6 in the main article is given here in Supplementary Table 9 by worker location group. This approach to presentation permits easy

comparison across location groups, whereas that in the paper permits evaluation by analysis method. Supplementary Table 3 shows information in the same format for unlagged REC exposures.

### ***3. Expanded categorical analysis by worker location group***

The expanded categorical analysis information presented in Tables 4–6 in the main article is given here in Supplementary Table 10 by worker location group. Supplementary Table 4 shows information in the same format for unlagged REC exposures, Supplementary Table 5 gives the 15-year lagged results for all tenures (i.e., without excluding workers with <5 years tenure), while Supplementary Table 6 gives the unlagged results for all tenures.

### ***4. Continuous models by worker location group***

The continuous modeling results shown in Tables 4–6 in the main article are given here in Supplementary Table 11 by worker location group. For cumulative REC exposure, results are given for untransformed exposure (log-linear model) and log exposure (power model) for the full range of exposures, and for untransformed exposures <1280  $\mu\text{g}/\text{m}^3\text{-y}$ . For average REC intensity, results are given for untransformed or log exposures over the full range of data.

### ***5. Continuous models – ever underground workers***

Supplementary Table 7 gives the hazard ratios (HRs) for unlagged and 15-year lagged continuous exposure models with no tenure exclusion and after removal of individuals with <2, <5, and <10 years of tenure at time of event for ever underground workers. For cumulative REC exposure, results are given for untransformed exposure (log-linear model) and log exposure (power model) for the full range of exposures, and for untransformed exposures <1280  $\mu\text{g}/\text{m}^3\text{-y}$ . For average REC intensity, results are given for untransformed or log exposures over the full range of data.

The continuous models in Table 4 of the main article were repeated excluding <5 years of tenure conditional on age at entry to the study facilities (Supplementary Table 12).

Three alternative metrics of historical REC exposure were examined to evaluate the robustness of the assumptions employed in the historical extrapolation of the REC exposures for ever underground workers. Details of their derivation are provided elsewhere (1). In brief, the first two approaches were variations on the modeling and extrapolation procedures in the exposure assessment: 1) employing average observed carbon monoxide (CO) data over time rather than modeled CO information (5-year average); or 2) using an extrapolation factor based on the power model of REC with CO, that is,  $REC_X = REC_R (CO_X/CO_R)^b$  as presented in the correlation analysis (2) rather than the direct proportionality ratio used in the primary exposure estimates  $REC_X = REC_R (CO_X/CO_R)$ . The third approach used the median instead of the arithmetic mean of the measurements for summarizing the measurement data by job. Identical exposure-response models were used as in Table 4 of the main article, with each alternative estimate replacing the primary metric (Supplementary Table 13).

The continuous models in Table 4 of the main article were repeated for each state/ore type (WY/trona, OH/salt, MO/limestone, and NM/potash) (Supplementary Table 14).

## **6. Continuous models – surface only workers**

Supplementary Table 8 gives the hazard ratios (HRs) for unlagged and 15-year lagged continuous exposure models for with no tenure exclusion and after exclusion of individuals with <2, <5, and <10 years of tenure at time of event for surface only workers. The results are given for untransformed exposure (log-linear model) and log exposure (power model) for the full range of exposures.

The continuous models in Table 5 of the main article were repeated excluding <5 years of

tenure conditional on age at entry to the study facilities (Supplementary Table 12).

**7. *Continuous models – ever underground and surface only workers***

The models in Tables 4 and 5 of the main article were repeated for underlying and contributing lung cancer causes combined (Supplementary Table 15). The models were repeated similarly for esophageal cancer (Supplementary Table 16).

**8. *Expanded categories and continuous models – ever underground workers***

The model results for ever underground workers shown in Supplementary Table 17 were derived using proportional hazard models with time since entry to study as the underlying time variable and adjusting for age and age<sup>2</sup> instead of using age as the time variable as in every other analysis. Also, in comparison to most other analyses, no restriction on tenure is applied. Results are given for the expanded categories and continuous models. The results should be compared with those given for the quartiles and expanded categories in Table 4 of the main article.

**Supplementary Table 1.** Causes of death examined in the standardized mortality ratio analysis\*

| <b>Abbreviated title in text</b>                           | <b>Full LTAS category</b>                                 | <b>ICD9 codes†</b>               |
|------------------------------------------------------------|-----------------------------------------------------------|----------------------------------|
| <b>A priori causes</b>                                     |                                                           |                                  |
| Lung cancer                                                | Malignant neoplasm of trachea, bronchus, and lung         | 162                              |
| Bladder cancer                                             | Malignant neoplasm of bladder and other urinary organs    | 188, 189.3–189.9                 |
| Kidney cancer                                              | Malignant neoplasm of kidney                              | 189.0–189.2                      |
| Intestinal cancer                                          | Malignant neoplasm of intestine excluding rectum          | 152, 153                         |
| Rectal cancer                                              | Malignant neoplasm of rectum                              | 154                              |
| Pancreatic cancer                                          | Malignancy of the pancreas                                | 157                              |
| Prostate cancer                                            | Malignant neoplasm of prostate                            | 185                              |
| Leukemia                                                   | Leukemia and aleukemia                                    | 204–208                          |
| Pneumonia                                                  | Pneumonia                                                 | 480–486                          |
| Chronic obstructive pulmonary disease                      | Chronic obstructive pulmonary disease                     | 490–492, 496                     |
| Ischemic heart disease                                     | Ischemic heart disease                                    | 410–414, 429.2                   |
| Cerebrovascular disease                                    | Cerebrovascular disease                                   | 430–438                          |
| Cirrhosis of the liver                                     | Cirrhosis and other chronic liver diseases                | 571                              |
| Multiple myeloma                                           | Multiple myeloma                                          | 203                              |
| Hodgkin lymphoma                                           | Hodgkin lymphoma                                          | 201                              |
| Influenza                                                  | Influenza                                                 | 487                              |
| All-cancer                                                 | All cancers                                               | 140–165, 170–175, 179–208, 273.3 |
| <b>Other causes mentioned in text</b>                      |                                                           |                                  |
| Esophageal cancer                                          | Malignant neoplasm of esophagus                           | 150                              |
| Other pneumoconiosis                                       | Other pneumoconiosis                                      | 500, 503, 505                    |
| Explosion                                                  | Explosion                                                 | E921, E923                       |
| Drowning                                                   | Drowning                                                  | E910                             |
| Electrocution                                              | Electrocution                                             | E925                             |
| Machine injuries                                           | Machine injuries                                          | E919                             |
| Alcoholism                                                 | Alcoholism                                                | 291, 303, 305.0                  |
| Diabetes mellitus                                          | Diabetes mellitus                                         | 250                              |
| Asbestosis                                                 | Asbestosis                                                | 501                              |
| Silicosis                                                  | Silicosis                                                 | 502                              |
| <b>Other causes with 10 or more deaths</b>                 |                                                           |                                  |
| Melanoma                                                   | Melanoma                                                  | 172                              |
| Stomach cancer                                             | Malignancy of stomach                                     | 151                              |
| Cancer of the biliary passages, liver, and gall bladder    | Cancer of the biliary passages, liver, and gall bladder   | 155, 156                         |
| Malignant neoplasm of other and unspecified sites (minor)  | Malignant neoplasm of other and unspecified sites (minor) | 187, 194–199                     |
| Other diseases of the nervous system and sense organs      | Other diseases of the nervous system and sense organs     | 325, 330–337, 341–389            |
| Non-Hodgkin lymphoma                                       | Non-Hodgkin lymphoma                                      | 200, 202, 273.3                  |
| Conductive disorder                                        | Conductive disorder                                       | 426–427                          |
| Malignant neoplasm of brain and other parts of the nervous | Malignant neoplasm of brain and other parts of the        | 191, 192                         |

|                                                        |                                                        |                                                           |
|--------------------------------------------------------|--------------------------------------------------------|-----------------------------------------------------------|
| system                                                 | nervous system                                         |                                                           |
| Diseases of the arteries, veins, and lymphatic vessels | Diseases of the arteries, veins, and lymphatic vessels | 415–417, 440–459                                          |
| Hypertension with heart disease                        | Hypertension with heart disease                        | 402, 404                                                  |
| Other diseases of the heart                            | Other disease of the heart                             | 420–423, 428, 429.0, 429.1, 429.3–429.9                   |
| Other diseases of digestive system                     | Other diseases of digestive system                     | 040.2, 520–530, 540–543, 555–558, 562–570, 572–579, 997.4 |
| Other respiratory diseases                             | Other respiratory diseases                             | 470–478, 494, 495, 504, 506–519                           |
| Cardiomyopathy                                         | Cardiomyopathy                                         | 425                                                       |

---

\* Disease categories are those intrinsic to the NIOSH Life Table Analysis System (LTAS) Life Table Program. For a full description of the cause-of-death groups used in the NIOSH life-table program see <http://www.cdc.gov/niosh/LTAS/rates.html>.) Note that the LTAS disease categories do not necessarily match the a priori disease causes exactly.

† ICD9 = International Classification of Diseases, 9th Revision. ICD9 codes are given for brevity because nearly all deaths fell within the period the 9th edition was in use.

**Supplementary Table 2.** Standardized mortality ratios for non-a priori causes statistically significantly different from 1.0 or with 10 or more deaths for the complete cohort and by worker location\*

| LTAS cause category†                                    | Worker location                              |                                                        |                                                    |
|---------------------------------------------------------|----------------------------------------------|--------------------------------------------------------|----------------------------------------------------|
|                                                         | Overall<br>No. deaths,<br>SMR (95% CI),<br>P | Ever underground‡<br>No. deaths,<br>SMR (95% CI),<br>P | Surface only§<br>No. deaths,<br>SMR (95% CI),<br>P |
| <b>Causes significantly different from 1.0</b>          |                                              |                                                        |                                                    |
| Other pneumoconiosis                                    | 15<br>12.20 (6.82 to 20.12)<br><.001         | 12<br>16.21 (8.37 to 28.32)<br><.001                   | 3<br>6.13 (1.26 to 17.91)<br>.027                  |
| Explosion                                               | 8<br>4.22 (1.82 to 8.31)<br>.002             | 5<br>3.96 (1.29 to 9.24)<br>.019                       | —                                                  |
| Electrocution                                           | 10<br>2.88 (1.38 to 5.30)<br>.006            | 8<br>3.51 (1.51 to 6.91)<br>.005                       | —                                                  |
| Drowning                                                | 18<br>2.80 (1.66 to 4.43)<br><.001           | 13<br>3.06 (1.63 to 5.23)<br>.001                      | —                                                  |
| Machine injuries                                        | 12<br>1.79 (0.93 to 3.13)<br>.081            | 11<br>2.56 (1.27 to 4.58)<br>.010                      | —                                                  |
| Esophageal cancer                                       | 23<br>1.83 (1.16 to 2.75)<br>.010            | 16<br>2.01 (1.15 to 3.26)<br>.016                      | —                                                  |
| Diabetes mellitus                                       | 29<br>0.66 (0.44 to 0.95)<br>.023            | 20<br>0.72 (0.44 to 1.11)<br>.151                      | —                                                  |
| Alcoholism                                              | 9<br>0.34 (0.15 to 0.64)<br><.001            | 6<br>0.33 (0.12 to 0.71)<br>.002                       | —                                                  |
| <b>Causes with 10 or more deaths</b>                    |                                              |                                                        |                                                    |
| Melanoma                                                | 15<br>1.52 (0.85 to 2.51)<br>.152            | 11<br>1.73 (0.86 to 3.09)<br>.120                      | —                                                  |
| Stomach cancer                                          | 24<br>1.28 (0.82 to 1.91)<br>.269            | 15<br>1.29 (0.72 to 2.12)<br>.396                      | —                                                  |
| Cancer of the biliary passages, liver, and gall bladder | 16<br>1.17 (0.67 to 1.89)<br>.606            | 10<br>1.16 (0.56 to 2.14)<br>.717                      | —                                                  |
| Malignant neoplasm of other and                         | 39                                           | 29                                                     | 10                                                 |



|                                       |                     |                     |                     |
|---------------------------------------|---------------------|---------------------|---------------------|
| unspecified sites (minor)             | 0.95 (0.67 to 1.30) | 1.13 (0.75 to 1.62) | 0.65 (0.31 to 1.19) |
|                                       | .820                | .568                | .201                |
| Other diseases of the nervous system  | 29                  | 20                  |                     |
| diseases and sense organs             | 0.93 (0.62 to 1.34) | 1.03 (0.63 to 1.59) | —                   |
|                                       | .783                | .954                |                     |
| Non-Hodgkin lymphoma                  | 17                  |                     | 10                  |
|                                       | 0.93 (0.54 to 1.49) | —                   | 1.49 (0.72 to 2.75) |
|                                       | .886                |                     | .280                |
| Conductive disorder                   | 30                  | 20                  | 10                  |
|                                       | 0.88 (0.59 to 1.26) | 0.96 (0.59 to 1.49) | 0.75 (0.36 to 1.38) |
|                                       | .551                | .985                | .449                |
| Malignant neoplasm of brain and other | 13                  |                     |                     |
| parts of the nervous system           | 0.84 (0.45 to 1.44) | —                   | —                   |
|                                       | .649                |                     |                     |
| Diseases of the arteries, veins, and  | 51                  | 29                  | 22                  |
| lymphatic vessels                     | 0.84 (0.63 to 1.11) | 0.80 (0.54 to 1.15) | 0.91 (0.57 to 1.38) |
|                                       | .248                | .261                | .752                |
| Hypertension with heart disease       | 11                  |                     |                     |
|                                       | 0.82 (0.41 to 1.47) | —                   | —                   |
|                                       | .631                |                     |                     |
| Other diseases of the heart           | 32                  | 20                  | 12                  |
|                                       | 0.82 (0.56 to 1.16) | 0.87 (0.53 to 1.35) | 0.76 (0.39 to 1.32) |
|                                       | .311                | .633                | .401                |
| Other diseases of digestive system    | 32                  | 23                  |                     |
|                                       | 0.82 (0.56 to 1.16) | 0.94 (0.60 to 1.41) | —                   |
|                                       | .298                | .879                |                     |
| Other respiratory diseases            | 23                  | 12                  | 11                  |
|                                       | 0.81 (0.52 to 1.22) | 0.71 (0.36 to 1.23) | 0.98 (0.49 to 1.75) |
|                                       | .371                | .268                | .905                |
| Cardiomyopathy                        | 12                  |                     |                     |
|                                       | 0.77 (0.40 to 1.35) | —                   | —                   |
|                                       | .455                |                     |                     |

\* Based on 12 270 individuals, which is the number in the study from 1960–1997, the period for which state rates were available (1960–2004). SMR = standardized mortality ratio; LTAS = Life Table Analysis System; CI = confidence interval; *P* = probability based on two-sided normal approximation to a Poisson distribution when number of deaths >10 or exact method otherwise; — indicates <10 deaths and no significant excess or deficit in deaths from the specified cause.

† See NIOSH-119 cause-of-death categories and corresponding ICD codes for 1960 through 2004 at <http://www.cdc.gov/niosh/LTAS/rates.html>.

‡ Categorized as ever underground after first going underground (even if surface later).

§ Categorized as surface only until first going underground (if ever).

**Supplementary Table 3.** Proportional hazards ratios on underlying-cause lung cancer mortality by quartiles of unlagged REC cumulative exposure and average intensity with no tenure exclusion, by worker location and for the complete cohort unadjusted and adjusted for worker location\*

| Analyses                                                      | Results for quartiles |                     |                     |                     |
|---------------------------------------------------------------|-----------------------|---------------------|---------------------|---------------------|
| <b>Ever underground workers†</b>                              |                       |                     |                     |                     |
| Cumulative REC exposure ( $\mu\text{g}/\text{m}^3\text{-y}$ ) |                       |                     |                     |                     |
| Exposure range                                                | 0-<318                | 318-<802            | 802-<1565           | $\geq 1565$         |
| No. LC deaths                                                 | 30                    | 31                  | 30                  | 31                  |
| REC HR (95% CI)                                               | 1.00                  | 1.41 (0.84 to 2.38) | 2.33 (1.39 to 3.92) | 1.52 (0.89 to 2.60) |
| <i>P</i>                                                      | (referent)            | .193                | .001                | .122                |
| Average REC intensity ( $\mu\text{g}/\text{m}^3$ )            |                       |                     |                     |                     |
| Exposure range                                                | 0-<42                 | 42-<71              | 71-<145             | $\geq 145$          |
| No. LC deaths                                                 | 30                    | 31                  | 30                  | 31                  |
| REC HR (95% CI)                                               | 1.00                  | 2.60 (1.52 to 4.44) | 1.97 (1.12 to 3.45) | 2.27 (1.23 to 4.17) |
| <i>P</i>                                                      | (referent)            | .001                | .018                | .008                |
| <b>Surface only workers‡</b>                                  |                       |                     |                     |                     |
| Cumulative REC exposure ( $\mu\text{g}/\text{m}^3\text{-y}$ ) |                       |                     |                     |                     |
| Exposure range                                                | 0-<4.9                | 4.9-<12             | 12-<23              | $\geq 23$           |
| No. LC deaths                                                 | 19                    | 20                  | 19                  | 20                  |
| REC HR (95% CI)                                               | 1.00                  | 0.92 (0.48 to 1.75) | 0.94 (0.49 to 1.79) | 0.61 (0.29 to 1.29) |
| <i>P</i>                                                      | (referent)            | .793                | .841                | .191                |
| Average REC intensity ( $\mu\text{g}/\text{m}^3$ )            |                       |                     |                     |                     |
| Exposure range                                                | 0-<0.86               | 0.86-<0.94          | 0.94-<1.91          | $\geq 1.91$         |
| No. LC deaths                                                 | 18                    | 19                  | 21                  | 20                  |
| REC HR (95% CI)                                               | 1.00                  | 2.56 (1.22 to 5.37) | 2.11 (0.98 to 4.55) | 2.30 (1.01 to 5.21) |
| <i>P</i>                                                      | (referent)            | .013                | .056                | .047                |
| <b>Complete cohort unadjusted for worker location</b>         |                       |                     |                     |                     |
| Cumulative REC exposure ( $\mu\text{g}/\text{m}^3\text{-y}$ ) |                       |                     |                     |                     |
| Exposure range                                                | 0-<18                 | 18-<198             | 198-<954            | $\geq 954$          |
| No. LC deaths                                                 | 50                    | 50                  | 50                  | 50                  |
| REC HR (95% CI)                                               | 1.00                  | 0.75 (0.49 to 1.15) | 0.86 (0.57 to 1.29) | 0.93 (0.61 to 1.41) |
| <i>P</i>                                                      | (referent)            | .190                | .462                | .737                |
| Average REC intensity ( $\mu\text{g}/\text{m}^3$ )            |                       |                     |                     |                     |
| Exposure range                                                | 0-<1.4                | 1.4-<29             | 29-<93              | $\geq 93$           |
| No. LC deaths                                                 | 50                    | 50                  | 50                  | 50                  |
| REC HR (95% CI)                                               | 1.00                  | 0.97 (0.64 to 1.48) | 1.19 (0.80 to 1.77) | 1.02 (0.66 to 1.57) |
| <i>P</i>                                                      | (referent)            | .884                | .384                | .933                |
| <b>Complete cohort adjusted for worker location§</b>          |                       |                     |                     |                     |
| Cumulative REC exposure ( $\mu\text{g}/\text{m}^3\text{-y}$ ) |                       |                     |                     |                     |
| Exposure range                                                | 0-<18                 | 18-<198             | 198-<954            | $\geq 954$          |
| No. LC deaths                                                 | 50                    | 50                  | 50                  | 50                  |
| REC HR (95% CI)                                               | 1.00                  | 0.86 (0.54 to 1.36) | 1.19 (0.63 to 2.22) | 1.29 (0.68 to 2.45) |
| <i>P</i>                                                      | (referent)            | .513                | .596                | .438                |
| Average REC intensity ( $\mu\text{g}/\text{m}^3$ )            |                       |                     |                     |                     |

| Exposure range  | 0-<1.4     | 1.4-<29             | 29-<93              | ≥93                 |
|-----------------|------------|---------------------|---------------------|---------------------|
| No. LC deaths   | 50         | 50                  | 50                  | 50                  |
| REC HR (95% CI) | 1.00       | 1.37 (0.84 to 2.22) | 2.34 (1.21 to 4.51) | 2.06 (1.03 to 4.12) |
| <i>P</i>        | (referent) | .207                | .011                | .042                |

\* REC = respirable elemental carbon; LC = lung cancer; HR = hazard ratio; CI = confidence interval; *P* = HR probability from two-sided  $X^2$  Wald test. Models adjusted for race/ethnicity, birth year, and sex (except ever underground); stratified by state.

† Workers categorized as ever underground after first going underground (even if surface later).

‡ Workers categorized as surface only until first going underground (if ever).

§ Adjusted using a time-dependent variable based on worker location.

**Supplementary Table 4.** Proportional hazards ratios for underlying-cause lung cancer mortality by unlagged REC cumulative exposure and average intensity using categorical exposure cut-points excluding workers with <5 years tenure, by worker location and for the complete cohort adjusted for worker location\*

| Analyses                                                      | Results for expanded exposure categories |                         |                         |                         |                         |                         |                         |                         |
|---------------------------------------------------------------|------------------------------------------|-------------------------|-------------------------|-------------------------|-------------------------|-------------------------|-------------------------|-------------------------|
| <b>Ever underground workers†</b>                              |                                          |                         |                         |                         |                         |                         |                         |                         |
| Cumulative REC exposure ( $\mu\text{g}/\text{m}^3\text{-y}$ ) |                                          |                         |                         |                         |                         |                         |                         |                         |
| Exposure range                                                | 0-<20                                    | 20-<40                  | 40-<80                  | 80-<160                 | 160-<320                | 320-<640                | 640-<1280               | $\geq 1280$             |
| No. LC deaths                                                 | 1                                        | 2                       | 1                       | 4                       | 8                       | 14                      | 28                      | 35                      |
| REC HR (95% CI)                                               | 1.00<br>(referent)                       | 1.57 (0.14 to<br>17.37) | 0.61 (0.04 to<br>9.91)  | 1.30 (0.14 to<br>11.95) | 2.05 (0.25 to<br>16.81) | 2.23 (0.29 to<br>17.27) | 4.69 (0.63 to<br>34.90) | 3.23 (0.43 to<br>24.24) |
| <i>P</i>                                                      |                                          | .714                    | .730                    | .817                    | .503                    | .441                    | .131                    | .253                    |
| Average REC intensity ( $\mu\text{g}/\text{m}^3$ )            |                                          |                         |                         |                         |                         |                         |                         |                         |
| Exposure range                                                | 0-<2                                     | 2-<4                    | 4-<8                    | 8-<16                   | 16-<32                  | 32-<64                  | 64-<128                 | $\geq 128$              |
| No. LC deaths                                                 | 2                                        | 2                       | 4                       | 6                       | 5                       | 30                      | 18                      | 26                      |
| REC HR (95% CI)                                               | 1.00<br>(referent)                       | 1.38 (0.19 to<br>9.96)  | 1.37 (0.25 to<br>7.64)  | 2.05 (0.40 to<br>10.42) | 1.72 (0.33 to<br>8.93)  | 4.61 (1.09 to<br>19.50) | 3.00 (0.68 to<br>13.18) | 4.38 (1.00-<br>19.23)   |
| <i>P</i>                                                      |                                          | .751                    | .721                    | .386                    | .518                    | .038                    | .146                    | .050                    |
| <b>Surface only workers‡</b>                                  |                                          |                         |                         |                         |                         |                         |                         |                         |
| Cumulative REC Exposure ( $\mu\text{g}/\text{m}^3\text{-y}$ ) |                                          |                         |                         |                         |                         |                         |                         |                         |
| Exposure range                                                | 0-<20                                    | 20-<40                  | 40-<80                  | $\geq 80$               |                         |                         |                         |                         |
| No. LC deaths                                                 | 32                                       | 13                      | 8                       | 4                       |                         |                         |                         |                         |
| REC HR (95% CI)                                               | 1.00<br>(referent)                       | 0.90 (0.43 to<br>1.86)  | 1.13 (0.41 to<br>3.09)  | 2.66 (0.67 to<br>10.56) |                         |                         |                         |                         |
| <i>P</i>                                                      |                                          | .769                    | .819                    | .165                    |                         |                         |                         |                         |
| Average REC intensity ( $\mu\text{g}/\text{m}^3$ )            |                                          |                         |                         |                         |                         |                         |                         |                         |
| Exposure range                                                | 0-<2                                     | 2-<4                    | $\geq 4$                |                         |                         |                         |                         |                         |
| No. LC deaths                                                 | 44                                       | 11                      | 2                       |                         |                         |                         |                         |                         |
| REC HR (95% CI)                                               | 1.00<br>(referent)                       | 1.36 (0.66 to<br>2.82)  | 2.34 (0.51 to<br>10.86) |                         |                         |                         |                         |                         |
| <i>P</i>                                                      |                                          | .411                    | .277                    |                         |                         |                         |                         |                         |
| <b>Complete cohort adjusted for worker locations§</b>         |                                          |                         |                         |                         |                         |                         |                         |                         |
| Cumulative REC Exposure ( $\mu\text{g}/\text{m}^3\text{-y}$ ) |                                          |                         |                         |                         |                         |                         |                         |                         |
| Exposure range                                                | 0-<20                                    | 20-<40                  | 40-<80                  | 80-<160                 | 160-<320                | 320-<640                | 640-<1280               | $\geq 1280$             |
| No. LC deaths                                                 | 33                                       | 15                      | 9                       | 8                       | 8                       | 14                      | 28                      | 35                      |
| REC HR (95% CI)                                               | 1.00<br>(referent)                       | 0.84 (0.44 to<br>1.60)  | 0.67 (0.29 to<br>1.53)  | 1.38 (0.52 to<br>3.62)  | 1.65 (0.54 to<br>5.04)  | 1.67 (0.60 to<br>4.64)  | 3.43 (1.32 to<br>8.93)  | 2.26 (0.86 to<br>5.95)  |
| <i>P</i>                                                      |                                          | .593                    | .342                    | .516                    | .381                    | .325                    | .012                    | .097                    |
| Average REC intensity ( $\mu\text{g}/\text{m}^3$ )            |                                          |                         |                         |                         |                         |                         |                         |                         |
| Exposure range                                                | 0-<2                                     | 2-<4                    | 4-<8                    | 8-<16                   | 16-<32                  | 32-<64                  | 64-<128                 | $\geq 128$              |
| No. LC deaths                                                 | 46                                       | 13                      | 6                       | 6                       | 5                       | 30                      | 18                      | 26                      |
| REC HR (95% CI)                                               | 1.00<br>(referent)                       | 1.22 (0.64 to<br>2.33)  | 1.57 (0.55 to<br>4.45)  | 2.10 (0.66 to<br>6.67)  | 1.48 (0.43 to<br>5.08)  | 3.59 (1.41 -<br>9.16)   | 2.17 (0.81 to<br>5.84)  | 2.92 (1.10 to<br>7.78)  |
| <i>P</i>                                                      |                                          | .542                    | .396                    | .207                    | .530                    | .007                    | .125                    | .032                    |

\* REC = respirable elemental carbon; LC = lung cancer; HR = hazard ratio; CI = confidence interval; HR probability from two-sided  $X^2$  Wald test. Individuals with <5 years tenure at time of event were excluded. Models adjusted for race/ethnicity, birth year, and sex (except ever underground); stratified by state.

† Workers categorized as ever underground after first going underground (even if surface later).  
‡ Workers categorized as surface only until first going underground (if ever).  
§ Adjusted using a time-dependent variable based on worker location.

**Supplementary Table 5.** Proportional hazards ratios for underlying-cause lung cancer mortality by 15-year lagged respirable elemental carbon cumulative exposure and average intensity using categorical exposure cut-points with no tenure restriction, by worker location and for the complete cohort adjusted for worker location\*

| <b>Analyses</b>                                               |                    | <b>Results for expanded exposure categories</b> |                         |                         |                        |                        |                        |                          |
|---------------------------------------------------------------|--------------------|-------------------------------------------------|-------------------------|-------------------------|------------------------|------------------------|------------------------|--------------------------|
| <b>Ever underground workers†</b>                              |                    |                                                 |                         |                         |                        |                        |                        |                          |
| Cumulative REC exposure ( $\mu\text{g}/\text{m}^3\text{-y}$ ) |                    |                                                 |                         |                         |                        |                        |                        |                          |
| Exposure range                                                | 0-<20              | 20-<40                                          | 40-<80                  | 80-<160                 | 160-<320               | 320-<640               | 640-<1280              | $\geq 1280$              |
| No. LC deaths                                                 | 20                 | 4                                               | 3                       | 12                      | 16                     | 21                     | 32                     | 14                       |
| REC HR (95% CI)                                               | 1.00<br>(referent) | 0.87 (0.29 to<br>2.61)                          | 0.57 (0.16 to<br>2.01)  | 1.31 (0.60 to<br>2.87)  | 1.37 (0.65 to<br>2.87) | 1.38 (0.68 to<br>2.80) | 2.42 (1.24 to<br>4.73) | 1.15 (0.51 to<br>2.61)   |
| <i>P</i>                                                      |                    | .803                                            | .385                    | .496                    | .411                   | .377                   | .010                   | .736                     |
| Average REC intensity ( $\mu\text{g}/\text{m}^3$ )            |                    |                                                 |                         |                         |                        |                        |                        |                          |
| Exposure range                                                | 0-<2               | 2-<4                                            | 4-<8                    | 8-<16                   | 16-<32                 | 32-<64                 | 64-<128                | $\geq 128$               |
| No. LC deaths                                                 | 20                 | 2                                               | 5                       | 9                       | 10                     | 29                     | 18                     | 29                       |
| REC HR (95% CI)                                               | 1.00<br>(referent) | 0.59 (0.13 to<br>2.62)                          | 0.65 (0.23 to<br>1.85)  | 1.24 (0.53 to<br>2.90)  | 1.20(0.53 to<br>2.72)  | 1.82 (0.94 to<br>3.53) | 1.21 (0.58 to<br>2.53) | 1.70 (0.86 to -<br>3.38) |
| <i>P</i>                                                      |                    | .487                                            | .417                    | .621                    | .655                   | .076                   | .610                   | .128                     |
| <b>Surface only workers‡</b>                                  |                    |                                                 |                         |                         |                        |                        |                        |                          |
| Cumulative REC exposure ( $\mu\text{g}/\text{m}^3\text{-y}$ ) |                    |                                                 |                         |                         |                        |                        |                        |                          |
| Exposure range                                                | 0-<20              | 20-<40                                          | 40-<80                  | $\geq 80$               |                        |                        |                        |                          |
| No. LC deaths                                                 | 65                 | 7                                               | 4                       | 2                       |                        |                        |                        |                          |
| REC HR (95% CI)                                               | 1.00<br>(referent) | 0.88 (0.37 to<br>2.09)                          | 1.59 (0.45 to<br>5.62)  | 5.82 (1.15 to<br>29.39) |                        |                        |                        |                          |
| <i>P</i>                                                      |                    | .765                                            | .470                    | .033                    |                        |                        |                        |                          |
| Average REC intensity ( $\mu\text{g}/\text{m}^3$ )            |                    |                                                 |                         |                         |                        |                        |                        |                          |
| Exposure range                                                | 0-<2               | 2-<4                                            | $\geq 4$                |                         |                        |                        |                        |                          |
| No. LC deaths                                                 | 61                 | 15                                              | 2                       |                         |                        |                        |                        |                          |
| REC HR (95% CI)                                               | 1.00<br>(referent) | 2.09 (1.11 to<br>3.96)                          | 2.38 (0.53 to<br>10.81) |                         |                        |                        |                        |                          |
| <i>P</i>                                                      |                    | .023                                            | .261                    |                         |                        |                        |                        |                          |
| <b>Complete cohort adjusted for worker location§</b>          |                    |                                                 |                         |                         |                        |                        |                        |                          |
| Cumulative REC exposure ( $\mu\text{g}/\text{m}^3\text{-y}$ ) |                    |                                                 |                         |                         |                        |                        |                        |                          |
| Exposure range                                                | 0-<20              | 20-<40                                          | 40-<80                  | 80-<160                 | 160-<320               | 320-<640               | 640-<1280              | $\geq 1280$              |
| No. LC deaths                                                 | 85                 | 11                                              | 7                       | 14                      | 16                     | 21                     | 32                     | 14                       |
| REC HR (95% CI)                                               | 1.00<br>(referent) | 0.72 (0.37 to<br>1.40)                          | 0.69 (0.30 to<br>1.59)  | 1.59 (0.80 to<br>3.16)  | 1.43 (0.73 to<br>2.81) | 1.38 (0.74 to<br>2.60) | 2.44 (1.36 to<br>4.36) | 1.15 (0.55 to<br>2.37)   |
| <i>P</i>                                                      |                    | .328                                            | .383                    | .190                    | .295                   | .311                   | .003                   | .712                     |
| Average REC intensity ( $\mu\text{g}/\text{m}^3$ )            |                    |                                                 |                         |                         |                        |                        |                        |                          |
| Exposure range                                                | 0-<2               | 2-<4                                            | 4-<8                    | 8-<16                   | 16-<32                 | 32-<64                 | 64-<128                | $\geq 128$               |
| No. LC deaths                                                 | 81                 | 17                                              | 7                       | 9                       | 10                     | 29                     | 18                     | 29                       |
| REC HR (95% CI)                                               | 1.00<br>(referent) | 1.59 (0.92 to<br>2.76)                          | 1.23 (0.52 to<br>2.89)  | 1.88 (0.85 to<br>4.17)  | 1.51 (0.70 to<br>3.27) | 2.15 (1.18 to<br>3.92) | 1.31 (0.67 to<br>2.56) | 1.72 (0.93 to<br>3.19)   |
| <i>P</i>                                                      |                    | .096                                            | .642                    | .121                    | .299                   | .012                   | .426                   | .086                     |

\*REC = respirable elemental carbon; LC = lung cancer; HR = hazard ratio; CI = confidence interval; HR probability from two-sided  $X^2$  Wald test. Models adjusted for race/ethnicity, birth year, and sex

(except ever underground); stratified by state.

† Workers categorized as ever underground after first going underground (even if surface later).

‡ Workers categorized as surface only until first going underground (if ever).

§ Adjusted using a time-dependent variable based on worker location.

**Supplementary Table 6.** Proportional hazards ratios for underlying-cause lung cancer mortality by unlagged respirable elemental carbon cumulative exposure and average intensity using categorical exposure cut-points with no tenure restriction, by worker location and for the complete cohort adjusted for worker location\*

| Analyses                                                      | Results for expanded exposure categories |               |               |               |               |               |               |               |
|---------------------------------------------------------------|------------------------------------------|---------------|---------------|---------------|---------------|---------------|---------------|---------------|
| <b>Ever underground workers†</b>                              |                                          |               |               |               |               |               |               |               |
| Cumulative REC exposure ( $\mu\text{g}/\text{m}^3\text{-y}$ ) |                                          |               |               |               |               |               |               |               |
| Exposure range                                                | 0-<20                                    | 20-<40        | 40-<80        | 80-<160       | 160-<320      | 320-<640      | 640-<1280     | $\geq 1280$   |
| No. LC deaths                                                 | 3                                        | 3             | 2             | 8             | 15            | 24            | 31            | 36            |
| REC HR (95% CI)                                               | 1.00                                     | 1.09 (0.22 to | 0.61 (0.10 to | 1.19 (0.31 to | 1.64 (0.46 to | 1.77 (0.52 to | 2.62 (0.79 to | 1.82 (0.54 to |
|                                                               | (referent)                               | 5.45)         | 3.69)         | 4.59)         | 5.80)         | 6.00)         | 8.72)         | 6.08)         |
| <i>P</i>                                                      |                                          | .912          | .591          | .803          | .446          | .362          | .116          | .332          |
| Average REC intensity ( $\mu\text{g}/\text{m}^3$ )            |                                          |               |               |               |               |               |               |               |
| Exposure range                                                | 0-<2                                     | 2-<4          | 4-<8          | 8-<16         | 16-<32        | 32-<64        | 64-<128       | $\geq 128$    |
| No. LC deaths                                                 | 3                                        | 2             | 4             | 7             | 7             | 33            | 25            | 41            |
| REC HR (95% CI)                                               | 1.00                                     | 1.12 (0.18 to | 1.06 (0.23 to | 1.86 (0.47 to | 1.56 (0.40 to | 3.63 (1.10 to | 2.64 (0.78 to | 3.78 (1.13 to |
|                                                               | (referent)                               | 6.81)         | 4.84)         | 7.41)         | 6.08)         | 12.00)        | 8.92)         | 12.66)        |
| <i>P</i>                                                      |                                          | .904          | .945          | .377          | .525          | .034          | .119          | .031          |
| <b>Surface only workers‡</b>                                  |                                          |               |               |               |               |               |               |               |
| Cumulative REC exposure ( $\mu\text{g}/\text{m}^3\text{-y}$ ) |                                          |               |               |               |               |               |               |               |
| Exposure range                                                | 0-<20                                    | 20-<40        | 40-<80        | $\geq 80$     |               |               |               |               |
| No. LC deaths                                                 | 52                                       | 14            | 8             | 4             |               |               |               |               |
| REC HR (95% CI)                                               | 1.00                                     | 0.77 (0.41 to | 0.76 (0.30 to | 1.51 (0.43 to |               |               |               |               |
|                                                               | (referent)                               | 1.46)         | 1.92)         | 5.33)         |               |               |               |               |
| <i>P</i>                                                      |                                          | .427          | .566          | .525          |               |               |               |               |
| Average REC intensity ( $\mu\text{g}/\text{m}^3$ )            |                                          |               |               |               |               |               |               |               |
| Exposure range                                                | 0-<2                                     | 2-<4          | $\geq 4$      |               |               |               |               |               |
| No. LC deaths                                                 | 59                                       | 15            | 4             |               |               |               |               |               |
| REC HR (95% CI)                                               | 1.00                                     | 1.24 (0.66 to | 2.85 (0.90 to |               |               |               |               |               |
|                                                               | (referent)                               | 2.34)         | 8.98)         |               |               |               |               |               |
| <i>P</i>                                                      |                                          | .511          | .074          |               |               |               |               |               |
| <b>Complete cohort adjusted for worker locations§</b>         |                                          |               |               |               |               |               |               |               |
| Cumulative REC exposure ( $\mu\text{g}/\text{m}^3\text{-y}$ ) |                                          |               |               |               |               |               |               |               |
| Exposure range                                                | 0-<20                                    | 20-<40        | 40-<80        | 80-<160       | 160-<320      | 320-<640      | 640-<1280     | $\geq 1280$   |
| No. LC deaths                                                 | 55                                       | 17            | 10            | 12            | 15            | 24            | 31            | 36            |
| REC HR (95% CI)                                               | 1.00                                     | 0.75 (0.43 to | 0.58 (0.28 to | 1.14 (0.51 to | 1.36 (0.58 to | 1.46 (0.67 to | 2.18 (1.02 to | 1.46 (0.68 to |
|                                                               | (referent)                               | 1.32)         | 1.22)         | 2.56)         | 3.18)         | 3.21)         | 4.66)         | 3.14)         |
| <i>P</i>                                                      |                                          | .325          | .152          | .744          | .475          | .341          | .045          | .333          |
| Average REC intensity ( $\mu\text{g}/\text{m}^3$ )            |                                          |               |               |               |               |               |               |               |
| Exposure range                                                | 0-<2                                     | 2-<4          | 4-<8          | 8-<16         | 16-<32        | 32-<64        | 64-<128       | $\geq 128$    |
| No. LC deaths                                                 | 62                                       | 17            | 8             | 7             | 7             | 33            | 25            | 41            |
| REC HR (95% CI)                                               | 1.00                                     | 1.25 (0.72 to | 1.89 (0.77 to | 2.44 (0.85 to | 1.69 (0.57 to | 3.69 (1.56 to | 2.42 (0.99 to | 3.16 (1.32 to |
|                                                               | (referent)                               | 2.19)         | 4.63)         | 7.04)         | 4.99)         | 8.72)         | 5.90)         | 7.570)        |
| <i>P</i>                                                      |                                          | .431          | .166          | .098          | .344          | .003          | .052          | .010          |

\* REC = respirable elemental carbon; LC = lung cancer; HR = hazard ratio; CI = confidence interval; *P* = HR probability from two-sided  $X^2$  Wald test. Models adjusted for race/ethnicity, birth year, and sex (except ever underground); stratified by state.



† Workers categorized as ever underground after first going underground (even if surface later).  
‡ Workers categorized as surface only until first going underground (if ever).  
§ Adjusted using a time-dependent variable based on worker location.

**Supplementary Table 7.** Proportional hazard ratios on underlying-cause lung cancer mortality by unlagged and 15-year lagged REC cumulative exposure and average intensity as continuous predictors with no tenure exclusion and excluding those with <2, <5, and <10 years tenure, for ever-underground workers\*

| Variable                   | REC exposure:              |                           |                           | Tenure exclusion                    |                                     |                                     |                                     |
|----------------------------|----------------------------|---------------------------|---------------------------|-------------------------------------|-------------------------------------|-------------------------------------|-------------------------------------|
|                            | Lag (years)                | Range                     | Units                     | None                                | <2 years                            | <5 years                            | <10 years                           |
|                            |                            |                           |                           | No. LC deaths, HR (95%CI), <i>P</i> |
| Cumulative REC exposure    | 0                          | Full                      | 1000 µg/m <sup>3</sup> -y | 122                                 | 111                                 | 93                                  | 78                                  |
|                            |                            |                           |                           | 1.01 (0.89 to 1.14)                 | 1.02 (0.90 to 1.16)                 | 1.05 (0.92 to 1.21)                 | 1.07 (0.92 to 1.25)                 |
|                            |                            | Full                      | Log µg/m <sup>3</sup> -y  | .890                                | .714                                | .467                                | .385                                |
|                            |                            |                           |                           | 122                                 | 111                                 | 93                                  | 78                                  |
|                            |                            |                           |                           | 1.15 (1.00 to 1.31)                 | 1.19 (1.03 to 1.38)                 | 1.26 (1.06 to 1.50)                 | 1.29 (1.06 to 1.57)                 |
|                            |                            |                           |                           | .046                                | .021                                | .010                                | .012                                |
|                            | <1280 µg/m <sup>3</sup> -y | 1000 µg/m <sup>3</sup> -y | 86                        | 75                                  | 58                                  | 47                                  |                                     |
|                            |                            |                           | 2.37 (1.31 to 4.28)       | 2.98 (1.58 to 5.62)                 | 4.07 (1.97 to 8.40)                 | 4.90 (2.18 to 11.03)                |                                     |
|                            | 15                         | Full                      | 1000 µg/m <sup>3</sup> -y | .004                                | .001                                | <.001                               | <.001                               |
|                            |                            |                           |                           | 122                                 | 111                                 | 93                                  | 78                                  |
|                            |                            | Full                      | Log µg/m <sup>3</sup> -y  | 1.03 (0.83 to 1.28)                 | 1.04 (0.83 to 1.30)                 | 1.07 (0.85 to 1.35)                 | 1.10 (0.85 to 1.43)                 |
|                            |                            |                           |                           | .817                                | .724                                | .585                                | .486                                |
| 122                        |                            |                           |                           | 111                                 | 93                                  | 78                                  |                                     |
| 1.07 (0.97 to 1.19)        |                            |                           |                           | 1.12 (1.00 to 1.25)                 | 1.19 (1.04 to 1.37)                 | 1.26 (1.06 to 1.50)                 |                                     |
| <1280 µg/m <sup>3</sup> -y | 1000 µg/m <sup>3</sup> -y  | .171                      | .052                      | .015                                | .009                                |                                     |                                     |
|                            |                            | 108                       | 97                        | 79                                  | 66                                  |                                     |                                     |
| Average REC intensity      | 0                          | Full                      | 100 µg/m <sup>3</sup>     | 122                                 | 111                                 | 93                                  | 78                                  |
|                            |                            |                           |                           | 1.27 (1.02 to 1.58)                 | 1.23 (0.97 to 1.56)                 | 1.18 (0.89 to 1.55)                 | 1.18 (0.85 to 1.64)                 |
|                            |                            | Full                      | Log µg/m <sup>3</sup>     | .036                                | .084                                | .246                                | .335                                |
|                            |                            |                           |                           | 122                                 | 111                                 | 93                                  | 78                                  |
|                            |                            |                           |                           | 1.35 (1.12 to 1.62)                 | 1.32 (1.09 to 1.60)                 | 1.32 (1.08 to 1.63)                 | 1.34 (1.07 to 1.68)                 |
|                            |                            |                           |                           | .002                                | .004                                | .008                                | .012                                |
|                            | Full                       | 100 µg/m <sup>3</sup>     | 122                       | 111                                 | 93                                  | 78                                  |                                     |
|                            |                            |                           | 1.14 (0.89 to 1.46)       | 1.20 (0.92 to 1.56)                 | 1.25 (0.93 to 1.68)                 | 1.32 (0.94 to 1.86)                 |                                     |
|                            | 15                         | Full                      | Log µg/m <sup>3</sup>     | .307                                | .182                                | .138                                | .106                                |
|                            |                            |                           |                           | 122                                 | 111                                 | 93                                  | 78                                  |
|                            | Full                       | Log µg/m <sup>3</sup>     | 1.11 (0.97 to 1.26)       | 1.17 (1.01 to 1.35)                 | 1.26 (1.06 to 1.50)                 | 1.33 (1.08 to 1.64)                 |                                     |
|                            |                            |                           | .129                      | .039                                | .010                                | .007                                |                                     |

\* REC = respirable elemental carbon; LC = lung cancer; HR = hazard ratio; CI = confidence interval; *P* = HR probability from two-sided X<sup>2</sup> Wald test. Individuals with <2, <5, and <10 years tenure at time of event were excluded. Workers categorized as ever underground after first going underground (even if surface later). Models adjusted for race/ethnicity and birth year; stratified by state. Race/ethnicity was unstable in models with restricted cumulative REC exposure range and tenures <5 and <10 years, and was omitted. Inclusion of the variable had little impact.

**Supplementary Table 8.** Proportional hazards ratios on underlying-cause lung cancer mortality by unlagged and 15-year lagged REC cumulative exposure and average intensity as continuous predictors with no tenure exclusion and excluding those with <2, <5, and <10 years tenure, for surface only workers\*

| Variable                | REC exposure:         |       |                                       | Tenure exclusion                               |                                                |                                                |                                                |                                   |
|-------------------------|-----------------------|-------|---------------------------------------|------------------------------------------------|------------------------------------------------|------------------------------------------------|------------------------------------------------|-----------------------------------|
|                         | Lag (years)           | Range | Units                                 | None                                           | <2 years                                       | <5 years                                       | <10 years                                      |                                   |
|                         |                       |       |                                       | No. LC deaths,<br>REC HR (95% CI),<br><i>P</i> |                                   |
| Cumulative REC exposure | 0                     | Full  | $\mu\text{g}/\text{m}^3\text{-y}$     | 78<br>1.00 (0.98 to 1.01)<br>.610              | 68<br>1.00 (0.99 to 1.01)<br>.959              | 57<br>1.00 (0.99 to 1.02)<br>.663              | 45<br>1.01 (0.99 to 1.02)<br>.447              |                                   |
|                         |                       | Full  | Log $\mu\text{g}/\text{m}^3\text{-y}$ | 78<br>0.91 (0.71 to 1.18)<br>.498              | 68<br>1.00 (0.72 to 1.38)<br>.979              | 57<br>1.01 (0.64 to 1.59)<br>.975              | 45<br>1.50 (0.77 to 2.92)<br>.239              |                                   |
|                         | 15                    | Full  | $\mu\text{g}/\text{m}^3\text{-y}$     | 78<br>1.01 (0.99 to 1.03)<br>.254              | 68<br>1.01 (1.00 to 1.03)<br>.107              | 57<br>1.02 (1.00 to 1.03)<br>.026              | 45<br>1.02 (1.01 to 1.04)<br>.007              |                                   |
|                         |                       | Full  | Log $\mu\text{g}/\text{m}^3\text{-y}$ | 78<br>0.93 (0.74 to 1.18)<br>.569              | 68<br>0.95 (0.73 to 1.24)<br>.707              | 57<br>1.03 (0.75 to 1.42)<br>.842              | 45<br>1.20 (0.79 to 1.83)<br>.395              |                                   |
|                         | Average REC intensity | 0     | Full                                  | $\mu\text{g}/\text{m}^3$                       | 78<br>1.26 (1.02 to 1.55)<br>.030              | 68<br>1.24 (0.99 to 1.55)<br>.056              | 57<br>1.21 (0.93 to 1.57)<br>.160              | 45<br>1.26 (0.95 to 1.66)<br>.112 |
|                         |                       |       | Full                                  | Log $\mu\text{g}/\text{m}^3$                   | 78<br>2.85 (1.27 to 6.42)<br>.011              | 68<br>2.72 (1.13 to 6.54)<br>.026              | 57<br>2.23 (0.78 to 6.36)<br>.135              | 45<br>2.51 (0.76 to 8.25)<br>.130 |
| 15                      |                       | Full  | $\mu\text{g}/\text{m}^3$              | 78<br>1.35 (1.08 to 1.68)<br>.008              | 68<br>1.31 (1.03 to 1.68)<br>.031              | 57<br>1.42 (1.10 to 1.82)<br>.006              | 45<br>1.46 (1.13 to 1.88)<br>.004              |                                   |
|                         |                       | Full  | Log $\mu\text{g}/\text{m}^3$          | 78<br>2.21 (1.11 to 4.41)<br>.025              | 68<br>2.02 (0.93 to 4.39)<br>.075              | 57<br>2.60 (1.07 to 6.29)<br>.034              | 45<br>3.34 (1.22 to 9.18)<br>.019              |                                   |

\* REC = respirable elemental carbon; LC = lung cancer; HR = hazard ratio; CI = confidence interval; *P* = HR probability from two-sided  $X^2$  Wald test. Individuals with <2, <5, and <10 years tenure at time of event were excluded. Workers categorized as surface only until first going underground (if ever). Models adjusted for race/ethnicity, birth year, and sex; stratified by state. Race/ethnicity was unstable in models excluding those with <10 years tenure and was omitted. Inclusion of the variable had little impact.

**Supplementary Table 9.** Proportional hazards ratios on underlying-cause lung cancer mortality by quartiles of 15-year lagged REC cumulative exposure and average intensity with no tenure exclusion, by worker location and for the complete cohort unadjusted and adjusted for worker location\*

| Analyses                                                        | Results for quartiles |                     |                     |                     |
|-----------------------------------------------------------------|-----------------------|---------------------|---------------------|---------------------|
| <b>Ever underground workers<sup>†</sup></b>                     |                       |                     |                     |                     |
| Cumulative REC exposure ( $\mu\text{g}/\text{m}^3\text{-y}$ )   |                       |                     |                     |                     |
| Exposure range                                                  | 0-<108                | 108-<445            | 445-<946            | $\geq 946$          |
| No. LC deaths                                                   | 30                    | 31                  | 30                  | 31                  |
| REC HR (95% CI)                                                 | 1.00 (referent)       | 1.50 (0.86 to 2.62) | 2.17 (1.21 to 3.88) | 2.21 (1.19 to 4.09) |
| <i>P</i>                                                        |                       | .152                | .009                | .012                |
| Average REC intensity ( $\mu\text{g}/\text{m}^3$ )              |                       |                     |                     |                     |
| Exposure range                                                  | 0-<11                 | 11-<51              | 51-<111             | $\geq 111$          |
| No. LC deaths                                                   | 30                    | 31                  | 30                  | 31                  |
| REC HR (95% CI)                                                 | 1.00 (referent)       | 1.73 (0.99 to 3.05) | 2.11 (1.14 to 3.90) | 1.86 (0.98 to 3.52) |
| <i>P</i>                                                        |                       | .056                | .018                | .057                |
| <b>Surface only workers<sup>‡</sup></b>                         |                       |                     |                     |                     |
| Cumulative REC exposure ( $\mu\text{g}/\text{m}^3\text{-y}$ )   |                       |                     |                     |                     |
| Exposure range                                                  | 0-<0.70               | 0.70-<4.6           | 4.6-<14             | $\geq 14$           |
| No. LC deaths                                                   | 19                    | 20                  | 19                  | 20                  |
| REC HR (95% CI)                                                 | 1.00 (referent)       | 1.28 (0.64 to 2.58) | 0.73 (0.35 to 1.53) | 1.00 (0.44 to 2.28) |
| <i>P</i>                                                        |                       | .490                | .407                | .998                |
| Average REC intensity ( $\mu\text{g}/\text{m}^3$ )              |                       |                     |                     |                     |
| Exposure range                                                  | 0-<0.57               | 0.57-<0.91          | 0.91-<1.4           | $\geq 1.4$          |
| No. LC deaths                                                   | 19                    | 18                  | 21                  | 20                  |
| REC HR (95% CI)                                                 | 1.00 (referent)       | 1.71 (0.82 to 3.58) | 2.22 (1.01 to 4.90) | 2.56 (1.09 to 6.03) |
| <i>P</i>                                                        |                       | .154                | .049                | .031                |
| <b>Complete cohort unadjusted for worker location</b>           |                       |                     |                     |                     |
| Cumulative REC exposure ( $\mu\text{g}/\text{m}^3\text{-y}$ )   |                       |                     |                     |                     |
| Exposure range                                                  | 0-<2.5                | 2.5-<56             | 56-<583             | $\geq 583$          |
| No. LC deaths                                                   | 50                    | 50                  | 50                  | 50                  |
| REC HR (95% CI)                                                 | 1.00 (referent)       | 0.58 (0.37 to 0.89) | 0.71 (0.45 to 1.10) | 0.93 (0.58 to 1.50) |
| <i>P</i>                                                        |                       | .014                | .125                | .778                |
| Average REC intensity ( $\mu\text{g}/\text{m}^3$ )              |                       |                     |                     |                     |
| Exposure range                                                  | 0-<0.86               | 0.86-<5.2           | 5.2-<60             | $\geq 60$           |
| No. LC deaths                                                   | 50                    | 50                  | 50                  | 50                  |
| REC HR (95% CI)                                                 | 1.00 (referent)       | 1.12 (0.72 to 1.75) | 1.32 (0.86 to 2.01) | 1.04 (0.66 to 1.64) |
| <i>P</i>                                                        |                       | .608                | .207                | .866                |
| <b>Complete cohort adjusted for worker location<sup>§</sup></b> |                       |                     |                     |                     |
| Cumulative REC exposure ( $\mu\text{g}/\text{m}^3\text{-y}$ )   |                       |                     |                     |                     |
| Exposure range                                                  | 0-<2.5                | 2.5-<56             | 56-<583             | $\geq 583$          |
| No. LC deaths                                                   | 50                    | 50                  | 50                  | 50                  |
| REC HR (95% CI)                                                 | 1.00 (referent)       | 0.55 (0.35 to 0.85) | 1.03 (0.60 to 1.77) | 1.39 (0.78 to 2.48) |
| <i>P</i>                                                        |                       | .007                | .925                | .261                |
| Average REC intensity ( $\mu\text{g}/\text{m}^3$ )              |                       |                     |                     |                     |

| Exposure range  | 0-<0.86         | 0.86-<5.2           | 5.2<60              | ≥60                 |
|-----------------|-----------------|---------------------|---------------------|---------------------|
| No. LC deaths   | 50              | 50                  | 50                  | 50                  |
| REC HR (95% CI) | 1.00 (referent) | 1.13 (0.72 to 1.76) | 1.98 (1.12 to 3.52) | 1.57 (0.86 to 2.86) |
| <i>P</i>        |                 | .600                | .019                | .144                |

\* REC = respirable elemental carbon; LC = lung cancer; HR = hazard ratio; CI = confidence interval; *P* = HR probability from two-sided  $X^2$  Wald test. Models adjusted for race/ethnicity, birth year, and sex (except ever underground); stratified by state.

† Workers categorized as ever underground after first going underground (even if surface later).

‡ Workers categorized as surface only until first going underground (if ever).

§ Adjusted using a time-dependent variable based on worker location.

**Supplementary Table 10.** Proportional hazards ratios for underlying-cause lung cancer mortality by 15-year lagged REC cumulative exposure and average intensity using categorical exposure cut-points excluding workers with <5 years tenure, by worker location and for the complete cohort adjusted for worker location\*

| <b>Analyses</b>                                               | <b>Results for expanded exposure categories</b> |                        |                         |                         |                        |                        |                         |                        |
|---------------------------------------------------------------|-------------------------------------------------|------------------------|-------------------------|-------------------------|------------------------|------------------------|-------------------------|------------------------|
| <b>Ever underground workers†</b>                              |                                                 |                        |                         |                         |                        |                        |                         |                        |
| Cumulative REC exposure ( $\mu\text{g}/\text{m}^3\text{-y}$ ) |                                                 |                        |                         |                         |                        |                        |                         |                        |
| Exposure range                                                | 0-<20                                           | 20-<40                 | 40-<80                  | 80-<160                 | 160-<320               | 320-<640               | 640-<1280               | $\geq 1280$            |
| No. LC deaths                                                 | 8                                               | 3                      | 2                       | 10                      | 12                     | 14                     | 30                      | 14                     |
| REC HR (95% CI)                                               | 1.00<br>(referent)                              | 1.39 (0.36 to<br>5.39) | 0.82 (0.17 to<br>4.03)  | 2.69 (0.99 to<br>7.37)  | 2.67 (0.98 to<br>7.27) | 2.21 (0.82 to<br>5.97) | 5.01 (1.97 to<br>12.76) | 2.39 (0.82 to<br>6.94) |
| <i>P</i>                                                      |                                                 | .634                   | .807                    | .054                    | .055                   | .119                   | .001                    | .109                   |
| Average REC intensity ( $\mu\text{g}/\text{m}^3$ )            |                                                 |                        |                         |                         |                        |                        |                         |                        |
| Exposure range                                                | 0-<2                                            | 2-<4                   | 4-<8                    | 8-<16                   | 16-<32                 | 32-<64                 | 64-<128                 | $\geq 128$             |
| No. LC deaths                                                 | 9                                               | 2                      | 5                       | 8                       | 8                      | 27                     | 14                      | 20                     |
| REC HR (95% CI)                                               | 1.00<br>(referent)                              | 0.93 (0.19 to<br>4.49) | 1.00 (0.31 to<br>3.18)  | 1.79 (0.65 to<br>4.92)  | 2.01 (0.74 to<br>5.50) | 3.20 (1.36 to<br>7.51) | 2.11 (0.81 to<br>5.48)  | 3.04 (1.20 to<br>7.71) |
| <i>P</i>                                                      |                                                 | .930                   | .998                    | .261                    | .173                   | .008                   | .125                    | .019                   |
| <b>Surface only workers‡</b>                                  |                                                 |                        |                         |                         |                        |                        |                         |                        |
| Cumulative REC exposure ( $\mu\text{g}/\text{m}^3\text{-y}$ ) |                                                 |                        |                         |                         |                        |                        |                         |                        |
| Exposure range                                                | 0-<20                                           | 20-<40                 | 40-<80                  | $\geq 80$               |                        |                        |                         |                        |
| No. LC deaths                                                 | 44                                              | 7                      | 4                       | 2                       |                        |                        |                         |                        |
| REC HR (95% CI)                                               | 1.00<br>(referent)                              | 1.16 (0.46 to<br>2.94) | 2.29 (0.60 to<br>8.75)  | 8.68 (1.61 to<br>46.90) |                        |                        |                         |                        |
| <i>P</i>                                                      |                                                 | .756                   | .224                    | .012                    |                        |                        |                         |                        |
| Average REC intensity ( $\mu\text{g}/\text{m}^3$ )            |                                                 |                        |                         |                         |                        |                        |                         |                        |
| Exposure range                                                | 0-<2                                            | 2-<4                   | $\geq 4$                |                         |                        |                        |                         |                        |
| No. LC deaths                                                 | 44                                              | 11                     | 2                       |                         |                        |                        |                         |                        |
| REC HR (95% CI)                                               | 1.00<br>(referent)                              | 2.33 (1.11 to<br>4.90) | 4.63 (0.99 to<br>21.55) |                         |                        |                        |                         |                        |
| <i>P</i>                                                      |                                                 | .026                   | .051                    |                         |                        |                        |                         |                        |
| <b>Complete cohort adjusted for worker locations§</b>         |                                                 |                        |                         |                         |                        |                        |                         |                        |
| Cumulative REC exposure ( $\mu\text{g}/\text{m}^3\text{-y}$ ) |                                                 |                        |                         |                         |                        |                        |                         |                        |
| Exposure range                                                | 0-<20                                           | 20-<40                 | 40-<80                  | 80-<160                 | 160-<320               | 320-<640               | 640-<1280               | $\geq 1280$            |
| No. LC deaths                                                 | 52                                              | 10                     | 6                       | 12                      | 12                     | 14                     | 30                      | 14                     |
| REC HR (95% CI)                                               | 1.00<br>(referent)                              | 0.92 (0.45 to<br>1.91) | 0.93 (0.36 to<br>2.37)  | 3.14 (1.39 to<br>7.14)  | 2.64 (1.13 to<br>6.20) | 1.99 (0.87 to<br>4.53) | 4.48 (2.13 to<br>9.40)  | 2.12 (0.89 to<br>5.06) |
| <i>P</i>                                                      |                                                 | .826                   | .876                    | .006                    | .026                   | .103                   | <.001                   | .089                   |
| Average REC intensity ( $\mu\text{g}/\text{m}^3$ )            |                                                 |                        |                         |                         |                        |                        |                         |                        |
| Exposure range                                                | 0-<2                                            | 2-<4                   | 4-<8                    | 8-<16                   | 16-<32                 | 32-<64                 | 64-<128                 | $\geq 128$             |
| No. LC deaths                                                 | 53                                              | 13                     | 7                       | 8                       | 8                      | 27                     | 14                      | 20                     |
| REC HR (95% CI)                                               | 1.00<br>(referent)                              | 1.72 (0.91 to<br>3.26) | 1.90 (0.75 to<br>4.80)  | 2.70 (1.07 to<br>6.79)  | 2.48 (0.98 to<br>6.30) | 3.62 (1.72 to<br>7.60) | 2.19 (0.95 to<br>5.06)  | 2.94 (1.31 to<br>6.60) |
| <i>P</i>                                                      |                                                 | .095                   | .174                    | .035                    | .056                   | .001                   | .067                    | .009                   |

\* REC = respirable elemental carbon; LC = lung cancer; HR = hazard ratio; CI = confidence interval; *P* = HR probability from two-sided  $X^2$  Wald test. Individuals with <5 years tenure at time of event

were excluded. Models adjusted for race/ethnicity, birth year, and sex (except ever underground); stratified by state.

† Workers categorized as ever underground after first going underground (even if surface later).

‡ Workers categorized as surface only until first going underground (if ever).

§ Adjusted using a time-dependent variable based on worker location.

**Supplementary Table 11.** Proportional hazard ratios for underlying-cause lung cancer mortality by 15-year lagged REC cumulative exposure and average intensity as continuous predictors excluding workers with <5 years tenure, by worker location and for the complete cohort adjusted for worker location\*

| Analyses                                             | Results for continuous models |                          |                            |
|------------------------------------------------------|-------------------------------|--------------------------|----------------------------|
| <b>Ever underground workers†</b>                     |                               |                          |                            |
| Cumulative REC exposure                              |                               |                          |                            |
| Exposure range                                       | Full                          | Full                     | <1280 µg/m <sup>3</sup> -y |
| Exposure units                                       | 1000 µg/m <sup>3</sup> -y     | Log µg/m <sup>3</sup> -y | 1000 µg/m <sup>3</sup> -y  |
| No. LC deaths                                        | 93                            | 93                       | 79                         |
| REC HR (95% CI)                                      | 1.07 (0.85 to 1.35)           | 1.19 (1.04 to 1.37)      | 4.06 (2.11 to 7.83)        |
| <i>P</i>                                             | .585                          | .015                     | <.001                      |
| Average REC intensity                                |                               |                          |                            |
| Exposure range                                       | Full                          | Full                     |                            |
| Exposure units                                       | 100 µg/m <sup>3</sup>         | Log µg/m <sup>3</sup>    |                            |
| No. LC deaths                                        | 93                            | 93                       |                            |
| REC HR (95% CI)                                      | 1.25 (0.93 to 1.68)           | 1.26 (1.06 to 1.50)      |                            |
| <i>P</i>                                             | .138                          | .010                     |                            |
| <b>Surface only workers‡</b>                         |                               |                          |                            |
| Cumulative REC exposure                              |                               |                          |                            |
| Exposure range                                       | Full                          | Full                     |                            |
| Exposure units                                       | µg/m <sup>3</sup> -y          | Log µg/m <sup>3</sup> -y |                            |
| No. LC deaths                                        | 57                            | 57                       |                            |
| REC HR (95% CI)                                      | 1.02 (1.00 to 1.03)           | 1.03 (0.75 to 1.42)      |                            |
| <i>P</i>                                             | .026                          | .842                     |                            |
| Average REC intensity                                |                               |                          |                            |
| Exposure range                                       | Full                          | Full                     |                            |
| Exposure units                                       | µg/m <sup>3</sup>             | Log µg/m <sup>3</sup>    |                            |
| No. LC deaths                                        | 57                            | 57                       |                            |
| REC HR (95% CI)                                      | 1.42 (1.10 to 1.82)           | 2.60 (1.07 to 6.29)      |                            |
| <i>P</i>                                             | .006                          | .034                     |                            |
| <b>Complete cohort adjusted for worker location§</b> |                               |                          |                            |
| Cumulative REC exposure                              |                               |                          |                            |
| Exposure range                                       | <1280 µg/m <sup>3</sup> -y    |                          |                            |
| Exposure units                                       | 1000 µg/m <sup>3</sup> -y     |                          |                            |
| No. LC deaths                                        | 136                           |                          |                            |
| REC HR (95% CI)                                      | 3.62 (1.99 to 6.60)           |                          |                            |
| <i>P</i>                                             | <.001                         |                          |                            |
| Average REC intensity                                |                               |                          |                            |
| Exposure range                                       | Full                          |                          |                            |
| Exposure units                                       | Log µg/m <sup>3</sup>         |                          |                            |
| No. LC deaths                                        | 150                           |                          |                            |
| REC HR (95% CI)                                      | 1.20 (1.04 to 1.39)           |                          |                            |
| <i>P</i>                                             | .015                          |                          |                            |

\* REC = respirable elemental carbon; LC = lung cancer; HR = hazard ratio; CI = confidence interval; *P* = HR probability from two-sided X<sup>2</sup> Wald test. Individuals with <5 years tenure at time of event were excluded. Models adjusted for race/ethnicity, birth year, and sex (except ever underground); stratified by state.



† Workers categorized as ever underground after first going underground (even if surface later). Race/ethnicity was unstable in model with restricted cumulative REC exposure range and was omitted. Inclusion of the variable had little impact.

‡ Workers categorized as surface only until first going underground (if ever).

§ Adjusted using a time-dependent variable based on worker location.

**Supplementary Table 12.** Proportional hazard ratios for underlying-cause lung cancer mortality by 15-year lagged REC cumulative exposure and average intensity as continuous predictors with no tenure exclusion and excluding workers with <5 years tenure by age at starting work at the study facilities, and by worker location\*

| REC exposure:                    |                                         |                                        | No tenure exclusion                      | Excluding <5 years tenure with starting age: |                                              |                                              |                                              | Excluding all <5 years tenure            |
|----------------------------------|-----------------------------------------|----------------------------------------|------------------------------------------|----------------------------------------------|----------------------------------------------|----------------------------------------------|----------------------------------------------|------------------------------------------|
| Variable                         | Range                                   | Units                                  | No. LC deaths, REC HR (95% CI), <i>P</i> | 60+ No. LC deaths, REC HR (95% CI), <i>P</i> | 50+ No. LC deaths, REC HR (95% CI), <i>P</i> | 40+ No. LC deaths, REC HR (95% CI), <i>P</i> | 30+ No. LC deaths, REC HR (95% CI), <i>P</i> | No. LC deaths, REC HR (95% CI), <i>P</i> |
| <b>Ever underground workers†</b> |                                         |                                        |                                          |                                              |                                              |                                              |                                              |                                          |
| Cumulative REC exposure          | <1280 $\mu\text{g}/\text{m}^3\text{-y}$ | 1000 $\mu\text{g}/\text{m}^3\text{-y}$ | 108<br>2.79 (1.59 to 4.89)<br><.001      | 107<br>2.89 (1.65 to 5.08)<br><.001          | 101<br>3.27 (1.84 to 5.79)<br><.001          | 92<br>3.50 (1.91 to 6.38)<br><.001           | 82<br>3.99 (2.10 to 7.58)<br><.001           | 79<br>4.06 (2.11 to 7.83)<br><.001       |
| Average REC intensity            | Full                                    | Log $\mu\text{g}/\text{m}^3$           | 122<br>1.11 (0.97 to 1.26)<br>.129       | 121<br>1.12 (0.98 to 1.28)<br>.090           | 115<br>1.22 (1.05 to 1.42)<br>.009           | 106<br>1.27 (1.08 to 1.50)<br>.005           | 96<br>1.26 (1.06 to 1.50)<br>.008            | 93<br>1.26 (1.06 to 1.50)<br>.010        |
| <b>Surface only workers‡</b>     |                                         |                                        |                                          |                                              |                                              |                                              |                                              |                                          |
| Cumulative REC exposure          | Full                                    | $\mu\text{g}/\text{m}^3\text{-y}$      | 78<br>1.01 (0.99 to 1.03)<br>.254        | 77<br>1.01 (0.99 to 1.03)<br>.222            | 76<br>1.01 (0.99 to 1.03)<br>.195            | 66<br>1.02 (1.00 to 1.03)<br>.063            | 62<br>1.02 (1.00 to 1.03)<br>.043            | 57<br>1.02 (1.00 to 1.03)<br>.026        |
| Average REC intensity            | Full                                    | $\mu\text{g}/\text{m}^3$               | 78<br>1.35 (1.08 to 1.68)<br>.008        | 77<br>1.35 (1.08 to 1.68)<br>.008            | 76<br>1.36 (1.09 to 1.70)<br>.006            | 66<br>1.48 (1.20 to 1.82)<br><.001           | 62<br>1.45 (1.16 to 1.80)<br>.001            | 57<br>1.42 (1.10 to 1.82)<br>.006        |

\* REC = respirable elemental carbon; LC = lung cancer; HR = hazard ratio; CI = confidence interval; *P* = HR probability from two-sided  $\chi^2$  Wald test. Individuals with <5 years tenure and starting age 60+, 50+, 40+, or 30+ years at time of event were excluded. Models adjusted for race/ethnicity, birth year, and sex (except ever underground); stratified by state.

† Workers categorized as ever underground after first going underground (even if surface later). Race/ethnicity was unstable in models with restricted cumulative REC exposure range and starting ages of 30+ and 40+, and was omitted. Inclusion of the variable had little impact.

‡ Workers categorized as surface only until first going underground (if ever).

**Supplementary Table 13.** Proportional hazards ratios on underlying-cause lung cancer mortality. Comparison of alternative 15-year lagged REC cumulative exposure and average intensity with primary estimates with no tenure exclusion and excluding those with <5 years tenure for ever underground workers\*

| Variable                | REC exposure:<br>Range     | Units                     | Tenure<br>exclusion | Metric         | No. LC<br>deaths | REC HR (95% CI)     | P     |
|-------------------------|----------------------------|---------------------------|---------------------|----------------|------------------|---------------------|-------|
| Cumulative REC exposure | <1280 µg/m <sup>3</sup> -y | 1000 µg/m <sup>3</sup> -y | None                | 5-year average | 105              | 1.83 (1.00 to 3.35) | .049  |
|                         |                            |                           |                     | Power          | 98               | 1.87 (1.03 to 3.43) | .041  |
|                         |                            |                           |                     | Median         | 109              | 2.35 (1.31 to 4.22) | .004  |
|                         |                            |                           |                     | Primary        | 108              | 2.79 (1.59 to 4.89) | <.001 |
|                         |                            |                           |                     | 5-year average | 76               | 2.39 (1.20 to 4.76) | .013  |
|                         |                            |                           |                     | Power          | 69               | 2.64 (1.29 to 5.41) | .008  |
|                         |                            |                           | <5 years            | Median         | 80               | 3.33 (1.71 to 6.47) | <.001 |
|                         |                            |                           |                     | Primary        | 79               | 4.06 (2.11 to 7.83) | <.001 |
|                         |                            |                           |                     | 5-year average |                  | 1.08 (0.95 to 1.23) | .262  |
|                         |                            |                           |                     | Power          |                  | 1.12 (0.98 to 1.28) | .098  |
|                         |                            |                           |                     | Median         | 122              | 1.11 (0.97 to 1.26) | .143  |
|                         |                            |                           |                     | Primary        |                  | 1.11 (0.97 to 1.26) | .129  |
| Average REC intensity   | Full                       | Log µg/m <sup>3</sup>     | <5 years            | 5-year average |                  | 1.22 (1.03 to 1.46) | .024  |
|                         |                            |                           |                     | Power          | 93               | 1.29 (1.08 to 1.55) | .006  |
|                         |                            |                           |                     | Median         |                  | 1.26 (1.06 to 1.51) | .010  |
|                         |                            |                           |                     | Primary        |                  | 1.26 (1.06 to 1.50) | .010  |

\* REC = respirable elemental carbon; LC = lung cancer; HR = hazard ratio; CI = confidence interval; P = HR probability from two-sided X<sup>2</sup> Wald test. For tenure exclusion analyses, individuals with <5 years tenure at time of event were excluded. Workers categorized as ever underground after first going underground (even if surface later). Models adjusted for race/ethnicity and birth year; stratified by state. Race/ethnicity was unstable in models with restricted cumulative REC exposure range and tenure <5 years excluded, and was omitted. Inclusion of the variable had little impact.

**Supplementary Table 14.** Proportional hazards ratios on underlying-cause lung cancer mortality by state/ore type. 15-year lagged REC cumulative exposure and average intensity as continuous predictors with no tenure exclusion and excluding those with <5 years tenure, for ever underground workers\*

| Variable                | REC exposure:<br>Range     | Units                     | Tenure<br>exclusion | State/ore type | No. LC deaths,<br>REC HR (95% CI) | P    |
|-------------------------|----------------------------|---------------------------|---------------------|----------------|-----------------------------------|------|
| Cumulative REC exposure | <1280 µg/m <sup>3</sup> -y | 1000 µg/m <sup>3</sup> -y | None                | MO/limestone   | 20<br>5.79 (1.71 to 19.58)        | .005 |
|                         |                            |                           |                     | NM/potash      | 59<br>2.19 (1.01 to 4.76)         | .047 |
|                         |                            |                           |                     | OH/salt        | 6<br>0.46 (0.03 to 8.21)          | .594 |
|                         |                            |                           |                     | WY/trona       | 23<br>4.33 (1.32 to 14.16)        | .015 |
|                         |                            |                           |                     | MO/limestone   | 20<br>5.78 (1.72 to 19.50)        | .005 |
|                         |                            |                           |                     | NM/potash      | 43<br>2.65 (1.05 to 6.65)         | .039 |
|                         |                            |                           | <5 years            | OH/salt        | 2<br>11.79 (0.06 to 2500)         | .367 |
|                         |                            |                           |                     | WY/trona       | 14<br>8.72 (1.82 to 41.69)        | .007 |
|                         |                            |                           |                     | MO/limestone   | 22<br>1.56 (1.03 to 2.35)         | .035 |
|                         |                            |                           |                     | NM/potash      | 64<br>1.12 (0.91 to 1.37)         | .289 |
|                         |                            |                           |                     | OH/salt        | 10<br>0.90 (0.65 to 1.25)         | .521 |
|                         |                            |                           |                     | WY/trona       | 26<br>1.09 (0.86 to 1.39)         | .467 |
| Average REC intensity   | Full                       | Log µg/m <sup>3</sup>     | <5 years            | MO/limestone   | 22<br>1.59 (1.05 to 2.43)         | .030 |
|                         |                            |                           |                     | NM/potash      | 48<br>1.14 (0.88 to 1.47)         | .317 |
|                         |                            |                           |                     | OH/salt        | 6<br>1.69 (0.55 to 5.22)          | .362 |
|                         |                            |                           |                     | WY/trona       | 17<br>1.26 (0.92 to 1.75)         | .155 |

\* REC = respirable elemental carbon; LC = lung cancer; HR = hazard ratio; CI = confidence interval; P = HR probability from two-sided X<sup>2</sup> Wald test. For tenure exclusion analyses, individuals with <5 years tenure at time of event were excluded. Workers categorized as ever underground after first going underground (even if surface later). Models adjusted birth year. Race/ethnicity was unstable in some models and was omitted. Inclusion of the variable had little impact, except for OH/salt and WY/trona where the HRs were 13.54 and 9.10 (P-values similar) for the restricted exposure and <5 years tenure group.

**Supplementary Table 15.** Proportional hazards ratios on underlying- and contributing-cause lung cancer mortality by 15-year lagged REC cumulative exposure and average intensity as continuous predictors with no tenure exclusion and excluding those with <5 years tenure, by worker location\*

| Variable                         | REC exposure:              |                           | Tenure exclusion                          |          |                                               |          |
|----------------------------------|----------------------------|---------------------------|-------------------------------------------|----------|-----------------------------------------------|----------|
|                                  | Range                      | Units                     | None<br>No. LC deaths,<br>REC HR (95% CI) | <i>P</i> | <5 years<br>No. LC deaths,<br>REC HR (95% CI) | <i>P</i> |
| <b>Ever underground workers†</b> |                            |                           |                                           |          |                                               |          |
| Cumulative REC exposure          | <1280 µg/m <sup>3</sup> -y | 1000 µg/m <sup>3</sup> -y | 116<br>2.48 (1.44 to 4.29)                | .001     | 85<br>3.44 (1.82 to 6.50)                     | <.001    |
| Average REC intensity            | Full                       | Log µg/m <sup>3</sup>     | 130<br>1.10 (0.97 to 1.25)                | .140     | 99<br>1.24 (1.05 to 1.47)                     | .012     |
| <b>Surface only workers‡</b>     |                            |                           |                                           |          |                                               |          |
| Cumulative REC exposure          | Full                       | µg/m <sup>3</sup> -y      | 82<br>1.01 (0.99 to 1.03)                 | .266     | 61<br>1.02 (1.00 to 1.03)                     | .035     |
| Average REC intensity            | Full                       | µg/m <sup>3</sup>         | 82<br>1.36 (1.09 to 1.69)                 | .006     | 61<br>1.43 (1.11 to 1.82)                     | .005     |
|                                  |                            | Log µg/m <sup>3</sup>     | 82<br>2.32 (1.17 to 4.58)                 | .016     | 61<br>2.75 (1.16 to 6.53)                     | .022     |

\* REC = respirable elemental carbon; LC = lung cancer; HR = hazard ratio; CI = confidence interval; *P* = HR probability from two-sided X<sup>2</sup> Wald test. Individuals with <5 years tenure at time of event were excluded. Models adjusted for race/ethnicity, birth year, and sex (except ever underground); stratified by state.

† Workers categorized as ever underground after first going underground (even if surface later). Race/ethnicity was unstable in models with restricted cumulative REC exposure range and tenure <5 years excluded, and was omitted. Inclusion of the variable had little impact.

‡ Workers categorized as surface only until first going underground (if ever).

**Supplementary Table 16.** Proportional hazards ratios on underlying-cause esophageal cancer mortality by 15-year lagged REC cumulative exposure and average intensity as continuous predictors with no tenure exclusion and excluding those with <5 years tenure, by worker location\*

| Variable                         | REC exposure:              |                           | Tenure exclusion                          |          |                                               |          |
|----------------------------------|----------------------------|---------------------------|-------------------------------------------|----------|-----------------------------------------------|----------|
|                                  | Range                      | Units                     | None<br>No. EC deaths,<br>REC HR (95% CI) | <i>P</i> | <5 years<br>No. EC deaths,<br>REC HR (95% CI) | <i>P</i> |
| <b>Ever underground workers†</b> |                            |                           |                                           |          |                                               |          |
| Cumulative REC exposure          | <1280 µg/m <sup>3</sup> -y | 1000 µg/m <sup>3</sup> -y | 14<br>1.33 (0.25 to 7.01)                 | .741     | 10<br>2.77 (0.40 to 19.01)                    | .300     |
| Average REC intensity            | Full                       | Log µg/m <sup>3</sup>     | 16<br>1.19 (0.81 to 1.73)                 | .373     | 12<br>1.43 (0.85 to 2.40)                     | .180     |
| <b>Surface only workers‡</b>     |                            |                           |                                           |          |                                               |          |
| Cumulative REC exposure          | Full                       | µg/m <sup>3</sup> -y      | 7<br>0.83 (0.65 to 1.05)                  | .127     | 5<br>0.83 (0.64 to 1.06)                      | .139     |
| Average REC intensity            | Full                       | µg/m <sup>3</sup>         | 7<br>0.43 (0.09 to 2.16)                  | .308     | 5<br>0.50 (0.06 to 4.01)                      | .515     |
|                                  |                            | Log µg/m <sup>3</sup>     | 7<br>0.33 (0.03 to 3.81)                  | .374     | 5<br>0.45 (0.02 to 12.28)                     | .637     |

\* REC = respirable elemental carbon; EC = esophageal cancer; HR = hazard ratio; CI = confidence interval; *P* = HR probability from two-sided X<sup>2</sup> Wald test. Individuals with <5 years tenure at time of event were excluded. Models adjusted for birth year; stratified by state. Race/ethnicity and sex (for surface only) were unstable in models and were omitted. Inclusion of the variables had little impact.

† Workers categorized as ever underground after first going underground (even if surface later).

‡ Workers categorized as surface only until first going underground (if ever).

**Supplementary Table 17.** Proportional hazards ratios on underlying-cause lung cancer mortality for 15-year lagged REC cumulative exposure and average intensity with no tenure exclusion, using time since follow-up as the underlying time variable. Expanded categories and continuous modeling results for ever underground workers\*

| Analyses                                                      | Results for expanded exposure categories |                     |                                       |                      |                                         |                      |                      |                      |
|---------------------------------------------------------------|------------------------------------------|---------------------|---------------------------------------|----------------------|-----------------------------------------|----------------------|----------------------|----------------------|
| <b>Expanded categories (122 LC deaths)</b>                    |                                          |                     |                                       |                      |                                         |                      |                      |                      |
| Cumulative REC exposure ( $\mu\text{g}/\text{m}^3\text{-y}$ ) |                                          |                     |                                       |                      |                                         |                      |                      |                      |
| Exposure range                                                | 0-<20                                    | 20-<40              | 40-<80                                | 80-<160              | 160-<320                                | 320-<640             | 640-<1280            | $\geq 1280$          |
| No. LC deaths                                                 | 20                                       | 4                   | 3                                     | 12                   | 16                                      | 21                   | 32                   | 14                   |
| REC HR (95% CI)                                               | 1.00                                     | 1.63 (0.35 to 7.47) | 1.23 (0.24 to 6.27)                   | 2.47 (0.67 to 9.17)  | 2.78 (0.77 to 9.98)                     | 2.88 (0.82 to 10.16) | 5.16 (1.49 to 17.81) | 2.56 (0.68 to 9.60)  |
| <i>P</i>                                                      |                                          | .532                | .803                                  | .175                 | .118                                    | .100                 | .009                 | .165                 |
| Average REC intensity ( $\mu\text{g}/\text{m}^3$ )            |                                          |                     |                                       |                      |                                         |                      |                      |                      |
| Exposure range                                                | 0-<2                                     | 2-<4                | 4-<8                                  | 8-<16                | 16-<32                                  | 32-<64               | 64-<128              | $\geq 128$           |
| No. LC deaths                                                 | 20                                       | 2                   | 5                                     | 9                    | 10                                      | 29                   | 18                   | 29                   |
| REC HR (95% CI)                                               | 1.00                                     | 1.24 (0.20 to 7.59) | 1.44 (0.33 to 6.27)                   | 2.73 (0.71 to 10.51) | 3.05 (0.82 to 11.44)                    | 4.84 (1.42 to 16.57) | 3.21 (0.89 to 11.51) | 4.85 (1.34 to 17.50) |
| <i>P</i>                                                      |                                          | .819                | .625                                  | .143                 | .097                                    | .012                 | .074                 | .016                 |
| <b>Continuous models</b>                                      |                                          |                     |                                       |                      |                                         |                      |                      |                      |
| Cumulative REC exposure                                       |                                          |                     |                                       |                      |                                         |                      |                      |                      |
| Exposure range                                                | Full                                     |                     | Full                                  |                      | <1280 $\mu\text{g}/\text{m}^3\text{-y}$ |                      |                      |                      |
| Exposure units                                                | 1000 $\mu\text{g}/\text{m}^3\text{-y}$   |                     | Log $\mu\text{g}/\text{m}^3\text{-y}$ |                      | 1000 $\mu\text{g}/\text{m}^3\text{-y}$  |                      |                      |                      |
| No. LC deaths                                                 | 122                                      |                     | 122                                   |                      | 108                                     |                      |                      |                      |
| REC HR (95% CI)                                               | 1.11 (0.87 to 1.40)                      |                     | 1.26 (1.07 to 1.49)                   |                      | 3.68 (1.99 to 6.79)                     |                      |                      |                      |
| <i>P</i>                                                      | .414                                     |                     | .006                                  |                      | <.001                                   |                      |                      |                      |
| Average REC intensity                                         |                                          |                     |                                       |                      |                                         |                      |                      |                      |
| Exposure range                                                | Full                                     |                     | Full                                  |                      |                                         |                      |                      |                      |
| Exposure units                                                | 100 $\mu\text{g}/\text{m}^3$             |                     | Log $\mu\text{g}/\text{m}^3$          |                      |                                         |                      |                      |                      |
| No. LC deaths                                                 | 122                                      |                     | 122                                   |                      |                                         |                      |                      |                      |
| REC HR (95% CI)                                               | 1.23 (0.92 to 1.65)                      |                     | 1.38 (1.12 to 1.71)                   |                      |                                         |                      |                      |                      |
| <i>P</i>                                                      | .160                                     |                     | .003                                  |                      |                                         |                      |                      |                      |

\* REC = respirable elemental carbon; LC = lung cancer; HR = hazard ratio; CI = confidence interval; *P* = HR probability from two-sided  $X^2$  Wald test. Workers categorized as ever underground after first going underground (even if surface later). Models adjusted for age, age<sup>2</sup>, race/ethnicity, and birth year; stratified by state.

## References

1. Stewart PA, Coble JB, Vermeulen R, Schleiff P, Blair A, Lubin JH, Attfield MD, Silverman DT [2010]. Diesel exhaust in miners study: I. Overview of the exposure assessment process. *Ann Occup Hyg* 54:728-746.
2. Vermeulen R, Coble JB, Yereb D, Lubin JH, Blair A, Portengen L, Stewart PA, Attfield MD, Silverman DT [2010]. The diesel exhaust in miners study: III. Interrelationships between respirable elemental carbon and gaseous and particulate components of diesel exhaust derived from area sampling in underground non-metal mining facilities. *Ann Occup Hyg* 54:762-773.
